# Supplementary material for: Enhancement of capacitive deionization capacity of hierarchical porous carbon
Source: Royal Society of Chemistry journal article supplement (doi:10.1039/c5ta01036e), 2015-01-01
Supplement: c5ta01036e1.pdf [file c5ta01036e1.pdf]

## Supporting Information

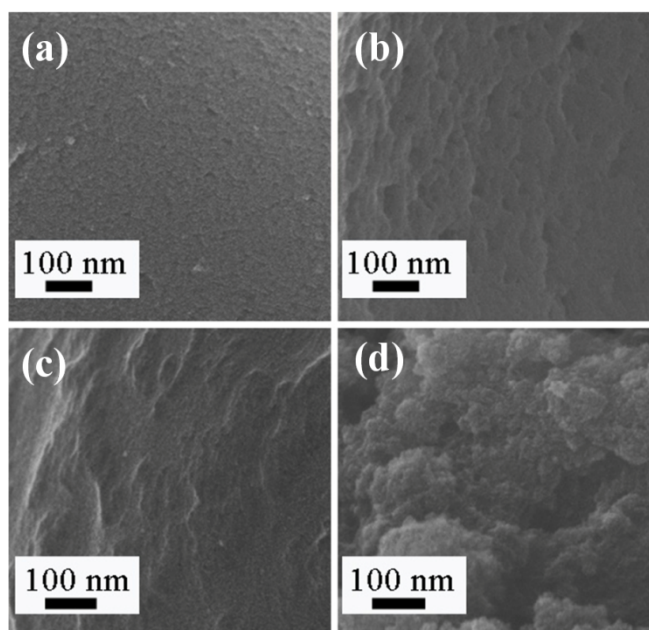

Fig. S1 High-magnification SEM images of (a) HPC-0.25, (b) HPC-0.5, (c) HPC-1.0 and (d) HPC-1.5.

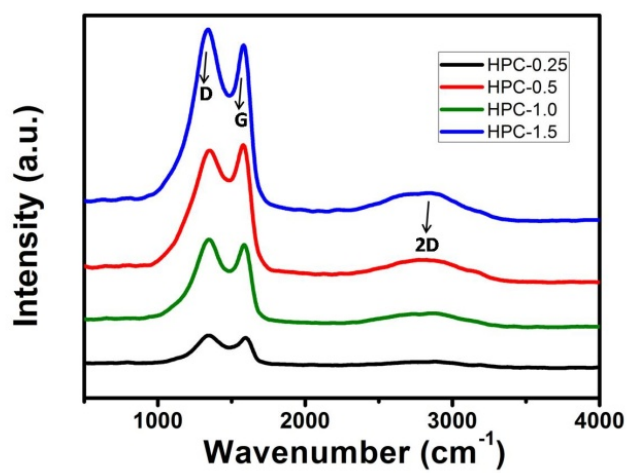

Fig. S2 Raman spectra of HPC-0.25/-0.5/-1.0/-1.5.

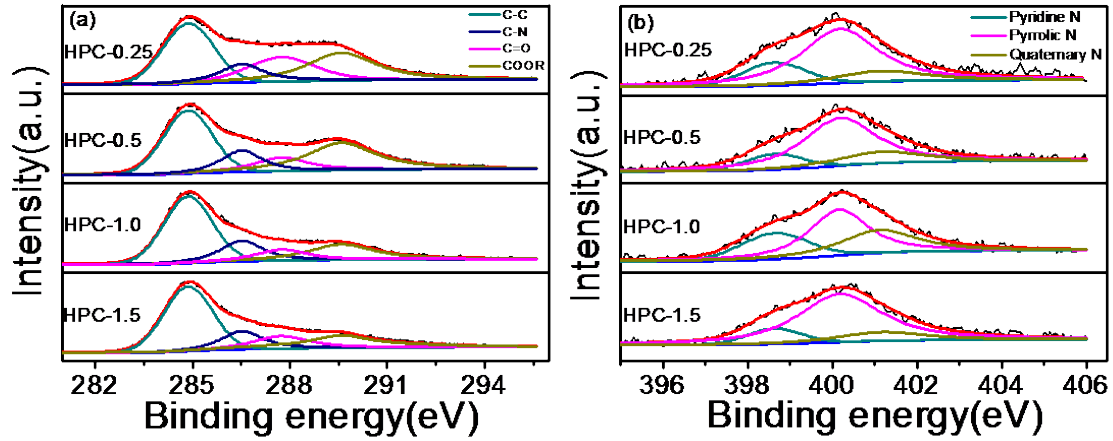

Fig. S3 (a) C1s and (b) N1s XPS spectra of HPC-0.25/-0.5/-1.0/-1.5.

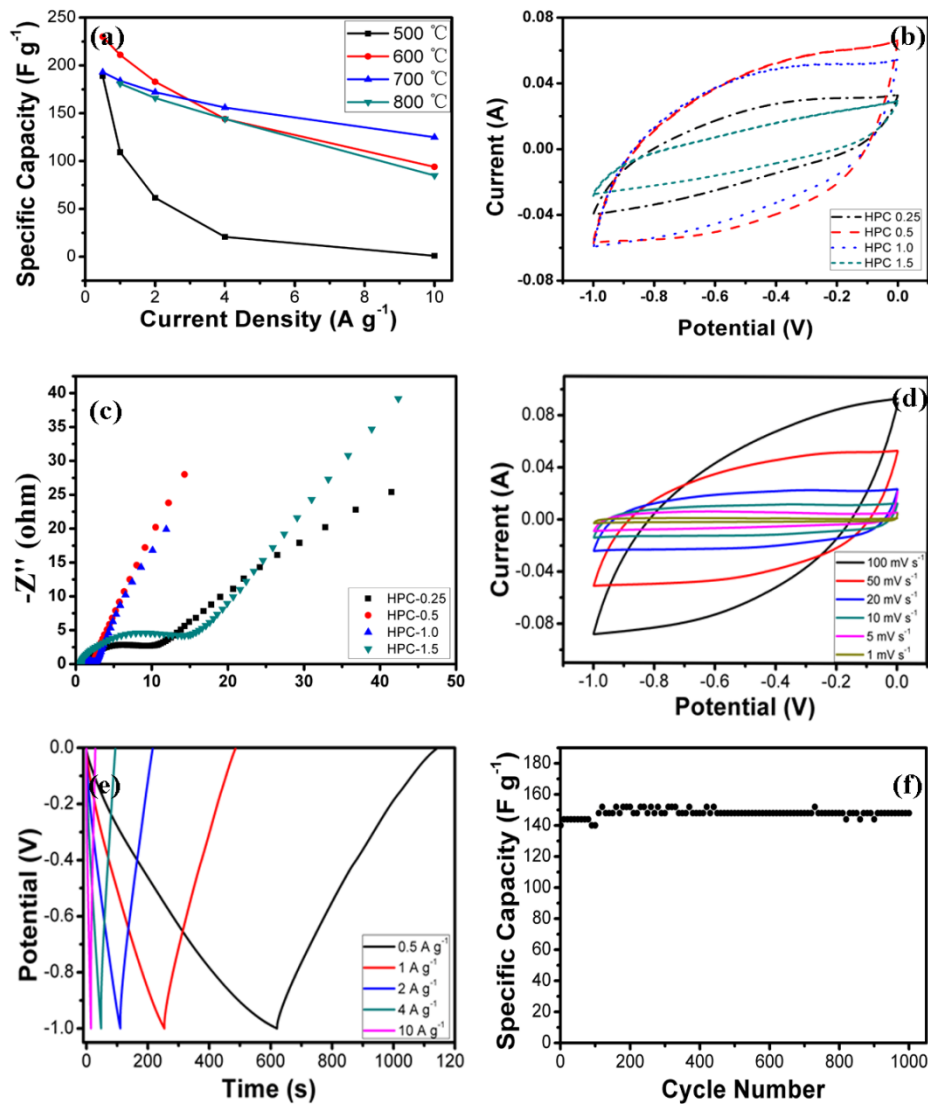

Fig. S4 Electrochemical performances of the HPCs in 6 mol L<sup>-1</sup> KOH: (a) specific capacitance of HPC-0.25 prepared at different temperatures, (b) CV curves of HPC-0.25/-0.5/-1.0/-1.5 at a scan rate of 50 mV s<sup>-1</sup>, (c) EIS curves of HPC-0.25/-0.5/-1.0/-1.5, (d) CV curves of HPC-0.5 at different scan rates, (e) GCD curves of HPC-0.5 at different current densities, (f) cycling stability of HPC-0.5 at a current density of 10 A g<sup>-1</sup>.

The CV, GCD and EIS measurements were performed in a three-electrode system at room temperature in 6.0 mol L<sup>-1</sup> KOH aqueous solution using a CHI 660D electrochemical station. The tested electrodes were prepared according to Ref.1. The mass of loaded active materials is 5 mg.

Firstly, the capacitance of HPCs with the same ratio (0.25) of KOH to EDTA annealed at different temperatures (500, 600, 700, and 800 °C, denoted as HPC-500, HPC-600, HPC-700, and HPC-800, respectively) were measured with applied voltage from 0 to 1.0 V. As shown in Fig. S4a, these materials had the similar specific capacitances of ~ 190 F g<sup>-1</sup> at a current density of 0.5 A g<sup>-1</sup> except for the sample annealed at 500 °C. Moreover, the capacitance of HPC-500 faded quickly as current density increased, which we attributed to the poor conductivity of the electrode material. HPC-700 showed slightly lower specific capacity at 0.5 A g<sup>-1</sup> but much higher rate capability while HPC-600 output even higher specific capacity at lower current density, indicating better conductivity and less functionality benefited a lot to comprehensive performance. After balancing input energy and overall performance, we chose 600 °C as the optimal annealing temperature.

Alkaline CV behaviors of the samples HPC-0.25/-0.5/1.0/1.5 were first collected at the scanning rate of 50 mV s<sup>-1</sup> and depicted in Fig. S4b. As presented, rectangular CV curves indicated the mechanism of double electrode layer formation. Compared to the others, the largest voltammogram area of HPC-0.5 could be simply translated into the highest capacitance. Further evidence was given in Fig. S4c that HPC-0.5 showed the lowest ohmic resistance, suggesting a facilitated electronic/ionic transfer. Detailed CV curves (at different scan rates of 1, 5, 10, 20, 50, and 100 mV s<sup>-1</sup>) and GCD (at different current densities of 0.5, 1, 2, 4 and 10 A g<sup>-1</sup>) of HPC-0.5 were showed in Fig. S4d and S4e, respectively. Near rectangular CV and linear GCD profiles were suggesting a superior capacitance behavior. Estimated from the GCD curves, HPC-0.5 showed a high capacitance of 260 F g<sup>-1</sup> at 0.5 A g<sup>-1</sup> and 235 F g<sup>-1</sup> at 1 A g<sup>-1</sup>. The capacitance still retained 148 F g<sup>-1</sup> at 10 A g<sup>-1</sup>, showing a very good rate

capability. The cycling stability of HPC-0.5 at a constant current density of  $10 \text{ A g}^{-1}$  were measured and shown in

Fig. S4f. It displayed a remarkably stable capacitance, without any degradation even after 1000 cycles.

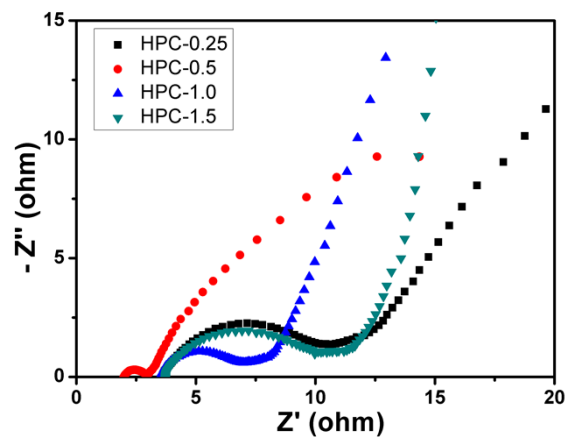

Fig. S5 EIS measurements of HPC-0.25/ -0.5/ -1.0/ -1.5 in  $1 \text{ mol L}^{-1} \text{ NaCl}$ .

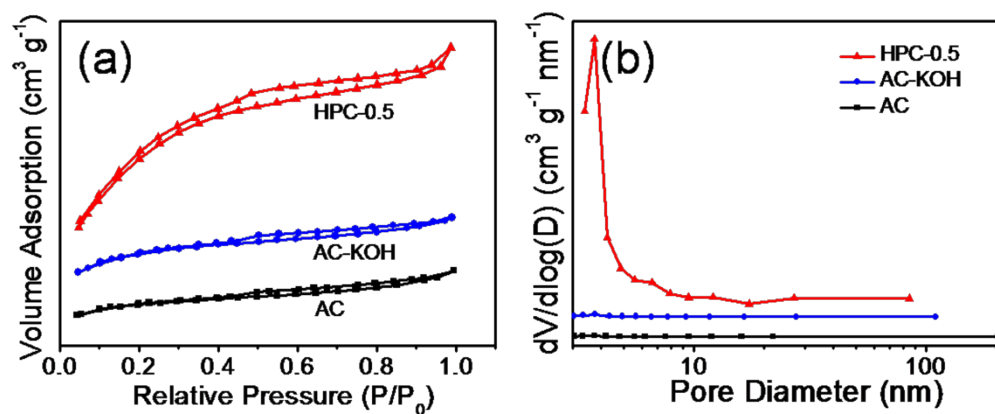

Fig. S6 (a)  $\text{N}_2$  adsorption-desorption isotherms and (b) pore size distributions of AC, AC-KOH and HPC-0.5.

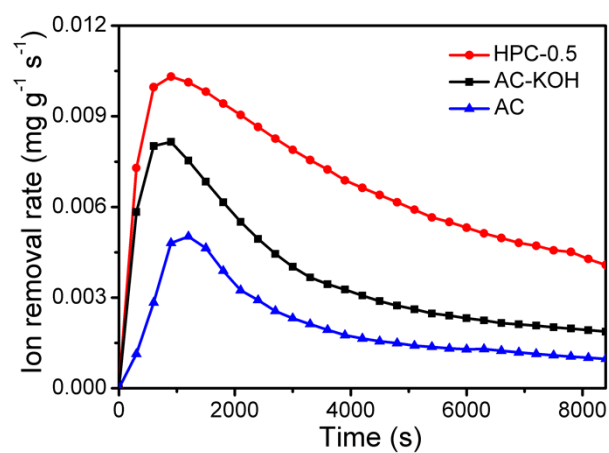

Fig. S7 Ion removal rates of HPC-0.5, AC and AC-KOH in  $40 \text{ mg L}^{-1} \text{ NaCl}$ .

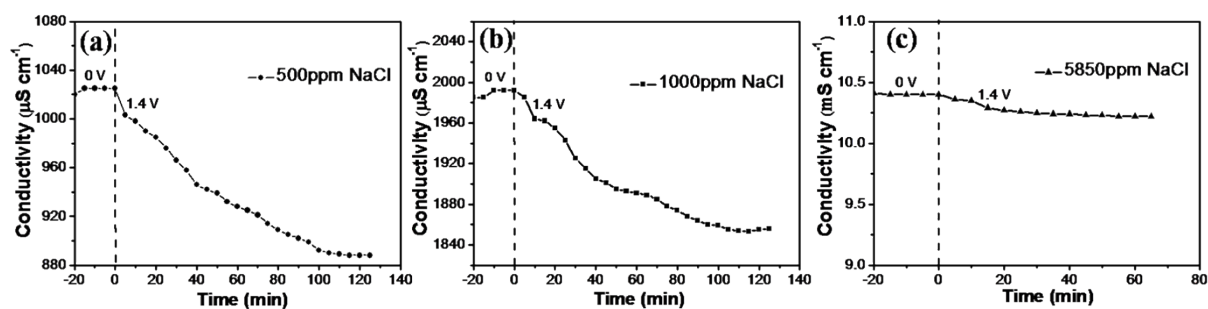

Fig. S8 The conductivity transients of HPC-0.5 in different concentrations of NaCl.

Table S1. Structural data of AC and AC-KOH.

| Sample | $S_{\text{BET}}$<br>$\text{m}^2 \text{g}^{-1}$ | $D_{\text{me}}$<br>nm | $V_{\text{total}}$<br>$\text{cm}^3 \text{g}^{-1}$ |
|--------|------------------------------------------------|-----------------------|---------------------------------------------------|
| AC     | 779.02                                         | 2.65                  | 0.517                                             |
| AC-KOH | 869.63                                         | 2.60                  | 0.565                                             |

Table S2. Elemental data of some ions.<sup>2</sup>

| ion              | Mass<br>(aum) | Charge | Hydrated radius (nm) | Charge/Radius (a. u.) |
|------------------|---------------|--------|----------------------|-----------------------|
| $\text{Li}^+$    | 6.941         | +1     | 0.382                | 2.62                  |
| $\text{K}^+$     | 39.10         | +1     | 0.331                | 3.02                  |
| $\text{Rb}^+$    | 85.47         | +1     | 0.329                | 3.04                  |
| $\text{Mg}^{2+}$ | 24.31         | +2     | 0.428                | 4.67                  |
| $\text{Al}^{3+}$ | 26.98         | +3     | 0.475                | 6.32                  |

- 1 Y. Fang, B. Luo, Y. Jia, X. Li, B. Wang, Q. Song, F. Kang and L. Zhi, *Adv. Mater.*, 2012, **24**, 6348-6355.
- 2 J. E. R. Nightingale, *The Journal of Physical Chemistry Letters*, 1959, **63**, 1381-1387.
